# Supplementary material for: Binding of GS-461203 and Its Halogen Derivatives to HCV Genotype 2a RNA Polymerase Drug Resistance Mutants
Source: MDPI journal article supplement (doi:10.3390/scipharm90020026), 2022-04-21
Supplement: s1 [file s1]

Archive with 1 entries (1 files):
- scipharm-1629962-supplementary.pdf
