# Supplementary material for: Binding of GS-461203 and Its Halogen Derivatives to HCV Genotype 2a RNA Polymerase Drug Resistance Mutants
Source: MDPI journal article supplement (doi:10.3390/scipharm90020026), 2022-04-21
Supplement: s1 [file s1 › scipharm-1629962-supplementary.pdf]

# Binding of GS-461203 and its Halogen Derivatives to HCV Genotype 2a RNA Polymerase Drug Resistance Mutants

Muhammad Arba<sup>1\*</sup>, Setyanto Tri Wahyudi<sup>2</sup>, Muhammad Sulaiman Zubair<sup>3</sup>, Dylan Brunt<sup>4</sup>, Mursalin Singh<sup>4</sup> and Chun Wu<sup>4\*</sup>

<sup>1</sup> Department of Pharmacy, Faculty of Pharmacy, Universitas Halu Oleo, Kendari 93232, Indonesia; muh.arba@uho.ac.id

<sup>2</sup> Department of Physics, IPB University, Bogor 16680, Indonesia

<sup>3</sup> Department of Pharmacy, Faculty of Science, Tadulako University, Palu 94118, Indonesia

<sup>4</sup> Department of Molecular & Cellular Biosciences, College of Science and Mathematics, Rowan University, Glassboro, New Jersey 08028, United States; wuc@rowan.edu

\* Correspondence: muh.arba@uho.ac.id (MA); wuc@rowan.edu (CW)

## Table caption

**Table S1.** The binding energies calculated for the last 50 ns of S282T system.

**Table S2.** The binding energies calculated for the last 50 ns of each individual trajectory.

## Figure caption

**Figure. S1** The docked and experimental poses of GS-461203.

**Figure S2.** The RMSD of Protein C $\alpha$  and ligand in WT run-1 (A), WT run-2 (B); T179A-run1 (C), T179A run-2 (D), S282T run-1 (E), S282T-run2 (F), M289L run-1 (G), and M289L run-2.

**Figure S3.** The histogram diagram and the fraction of the simulation for each type of interaction showing all residues interacting with GS-461203 (**A:** WT-GS-461203; **B:** T179A-GS-461203; **C:** S282T-GS-461203; **D:** M289L-GS-461203) recorded during MDS.

**Figure S4.** Protein-Ligand Interactions **A:** WT-GS-461203-run1; **B:** WT-GS-461203-run3; **C:** T179A-GS-461203-run3; **D:** T179A-GS-461203-run4; **E:** S282T-GS-461203-run1; **F:** S282T-GS-461203-run2; **G:** M289L-GS-461203-run1; **H:** M289L-GS-461203-run3, recorded during MDS. Left: the histogram diagram and the fraction of the simulation for each type of interaction showing all residues interacting with GS-461203. Right: The 2D Protein-Ligand interactions Diagrams lasting more than 20% of the MDS.

**Figure S5.** The representative structure of the most dominant structural family for **A:** WT; **B:** T179A; **C:** S282T, **D:** M289L systems.

**Figure S6.** The least populated clusters for A: WT; B: T179A; C: S282T, D: M289L.

**Figure S7.** The RMSF values comparisons between WT and T179A (**A**), WT and S282T (**B**), and WT and M289L (**C**). The RMSF values of the C $\alpha$  atoms for residues in WT (black), T179A (green), S282T (red), and M289L (blue) are shown, and the mutant positions are noted by red asterisks.

**Figure S8.** The RMSF values for atoms of GS-461203.

**Figure S9.** The RMSD of Protein C $\alpha$  and ligand in T179A-CompA (**A**) and T179A-CompB (**B**) systems.

**Figure S10.** Protein-Ligand Interactions (**A:** T179A-CompA; **B:** T179A-CompB) recorded during MDS. Left: the histogram diagram and the fraction of the simulation for each type of interaction showing all residues interacting with GS-461203. Right: The 2D Protein-Ligand interactions Diagrams lasting more than 20% of the MDS.

**Figure S11** The most dominant clusters for **A:** T179A-CompA; **B:** T179A-CompB systems.

**Figure S12.** The RMSF values comparisons between T179A, T179A-CompA, and T179A-CompB systems. The RMSF values of the C $\alpha$  atoms for residues in T179A (black), T179A-CompA (green), and T179A-CompB (blue).

**Figure S13.** The RMSF values for atoms of GS-461203 in T179A, T179A-CompA, and T179A-CompB systems.

**Figure S14.** The ADME Properties of Sofosbuvir predicted by SwissAdme.

**Figure S15.** The ADME Properties of Sofosbuvir derivatives (F substituted by Cl) predicted by SwissAdme.

**Figure S16.** The ADME Properties of Sofosbuvir derivatives (F substituted by I) predicted by SwissAdme.

**Figure S17.** The ADME Properties of GS-461203 predicted by SwissAdme.

**Figure S18.** The ADME Properties of CompA predicted by SwissAdme.

**Figure S19.** The ADME Properties of CompB predicted by SwissAdme.

**Table S1.** The binding energies calculated for the last 50 ns of S282T system.

| Systems                        | S282T            |
|--------------------------------|------------------|
| $\Delta G_{\text{bind}}$       | -41.3 $\pm$ 5.4  |
| $\Delta\Delta G_{\text{bind}}$ | 4.2              |
| $\Delta E_{\text{vdw}}$        | 2.4 $\pm$ 12.1   |
| $\Delta\Delta E_{\text{vdw}}$  | 8.4              |
| $\Delta E_{\text{ele}}$        | -40.3 $\pm$ 10.8 |
| $\Delta\Delta E_{\text{ele}}$  | 5                |
| $\Delta E_{\text{lipo}}$       | -3.4 $\pm$ 0.9   |
| $\Delta\Delta E_{\text{lipo}}$ | 0.9              |

**Table S2.** The binding energies calculated for the last 50 ns of each individual trajectory.

| Systems | Run-1           | Run-2           |
|---------|-----------------|-----------------|
| WT      | -45.2 $\pm$ 6.0 | -45.8 $\pm$ 5.6 |
| T179    | -35.0 $\pm$ 5.9 | -34.9 $\pm$ 4.7 |
| S282    | -43.3 $\pm$ 4.6 | -39.2 $\pm$ 5.5 |
| M289    | -58.0 $\pm$ 6.4 | -49.9 $\pm$ 6.8 |

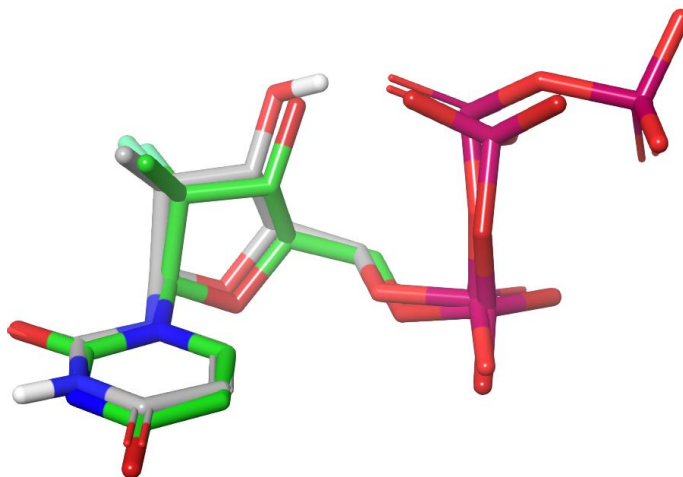

**Figure S1.** The docked GS-461203 (gray) and experimental poses of Sofosbuvir diphosphate (green).

A

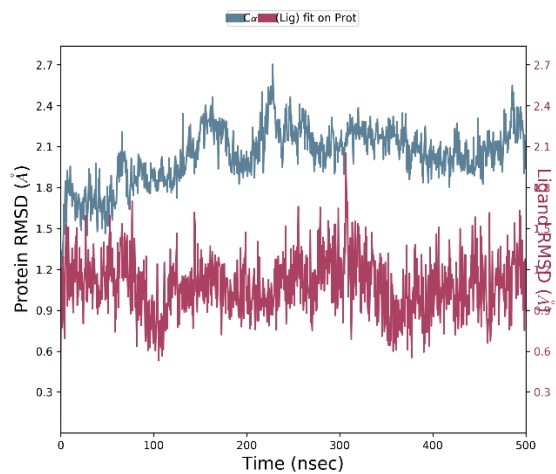

B

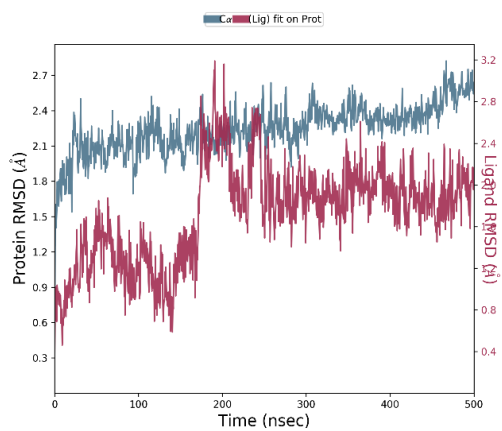

C

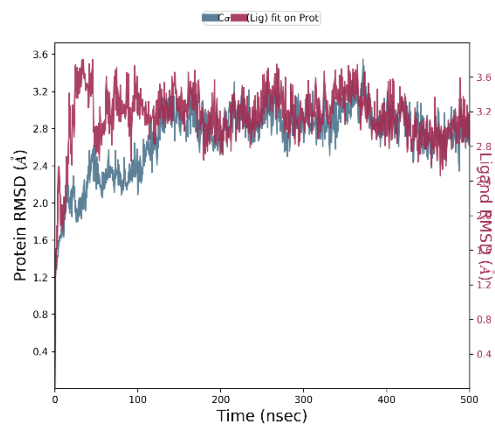

D

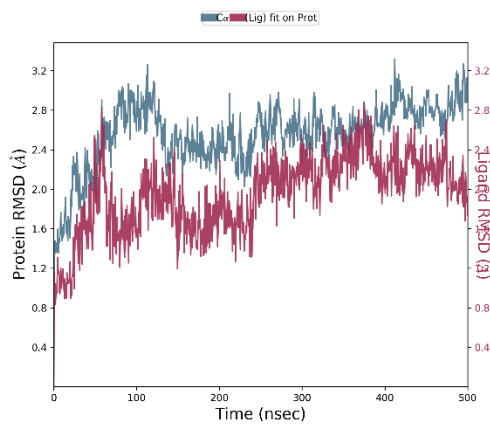

E

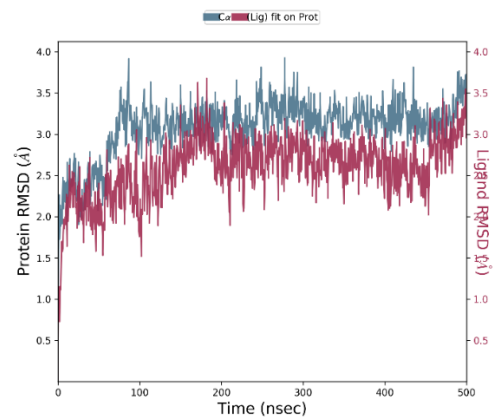

F

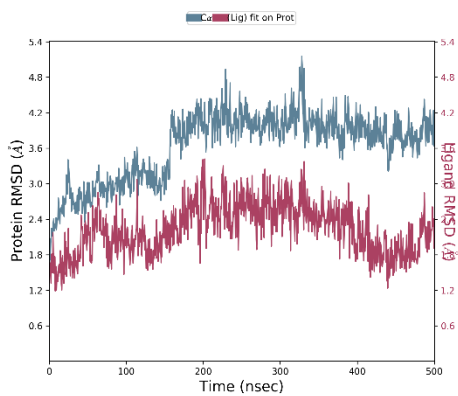

G

H

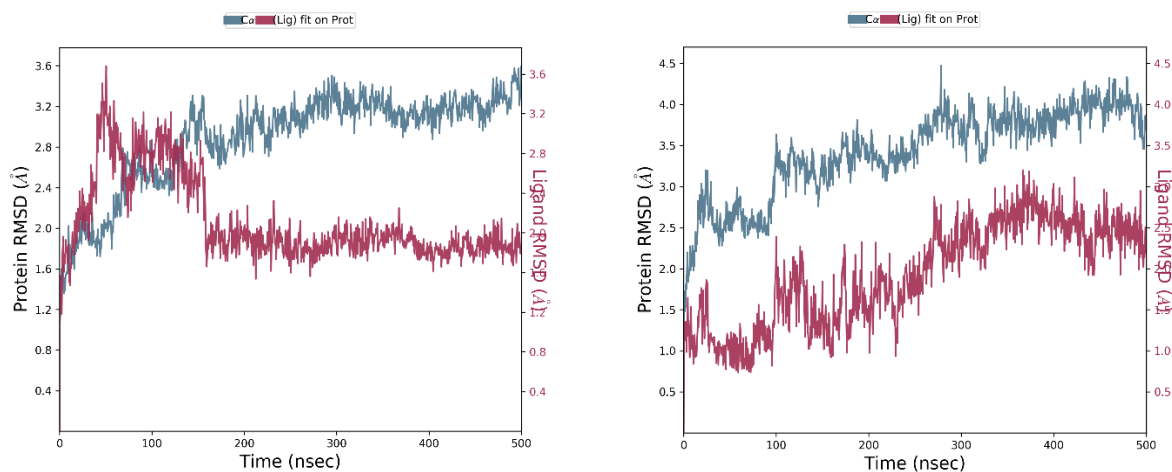

**Figure S2.** The RMSD of Protein Cα and ligand in WT run-1 (A), WT run-2 (B); T179A-run1 (C), T179A run-2 (D), S282T run-1 (E), S282T-run2 (F), M289L run-1 (G), and M289L run-2.

**A**

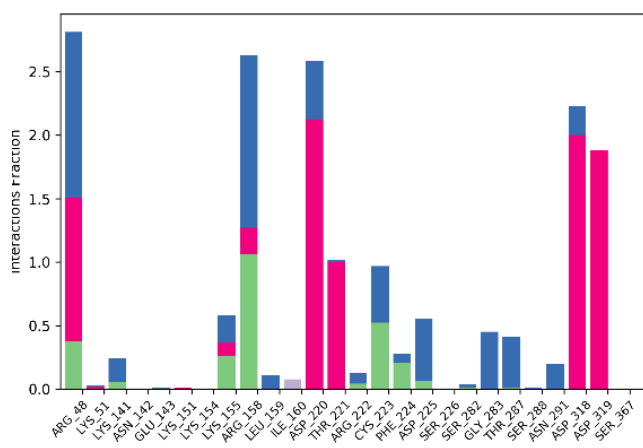

**B**

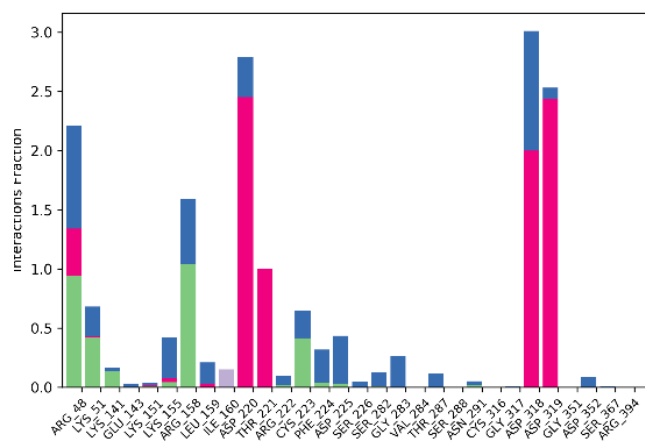

C

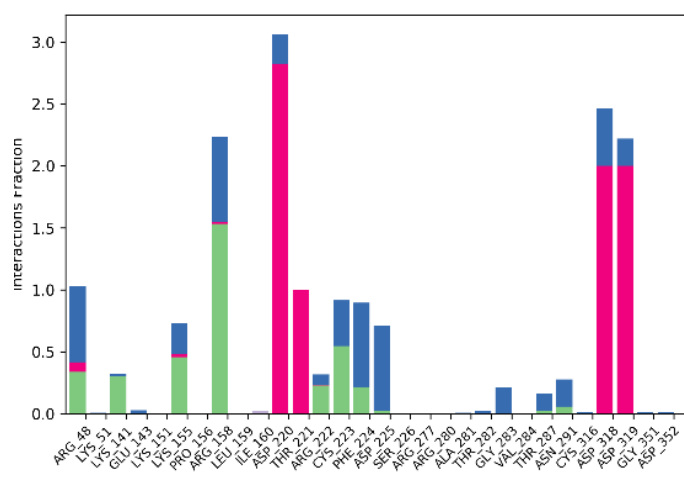

D

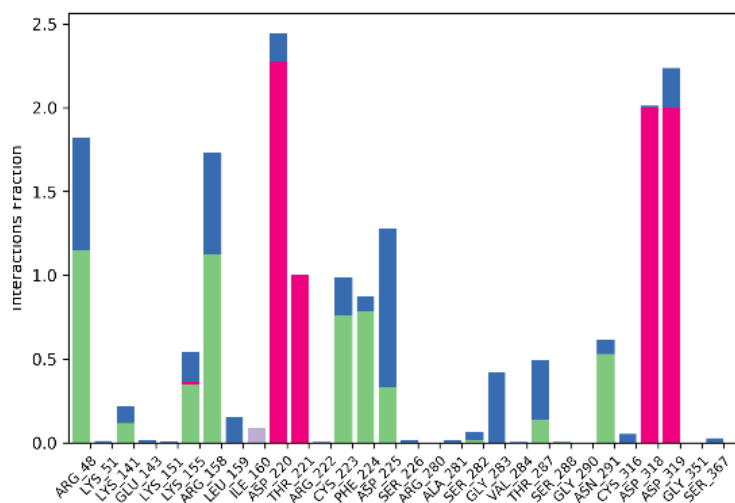

**Figure S3.** The histogram diagram and the fraction of the simulation for each type of interaction showing all residues interacting with GS-461203 (**A:** WT-GS-461203; **B:** T179A-GS-461203; **C:** S282T-GS-461203; **D:** M289L-GS-461203) recorded during MDS.

**A**

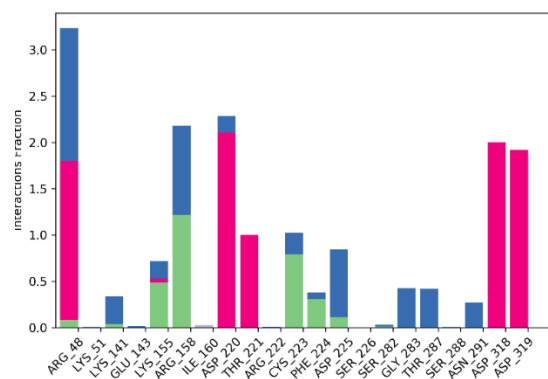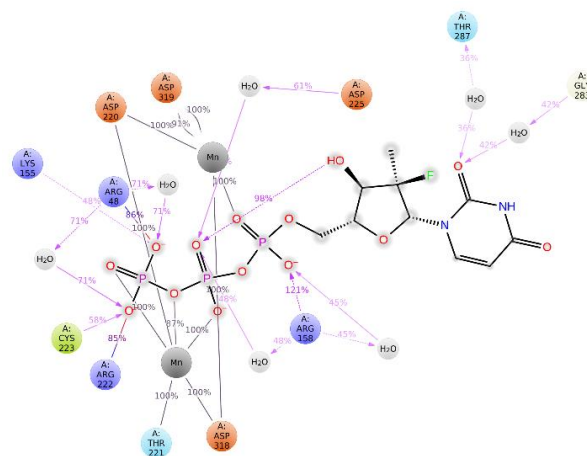

**B**

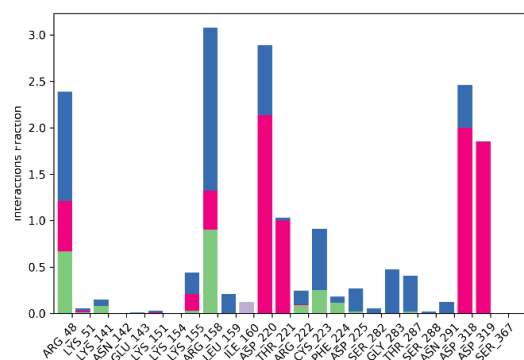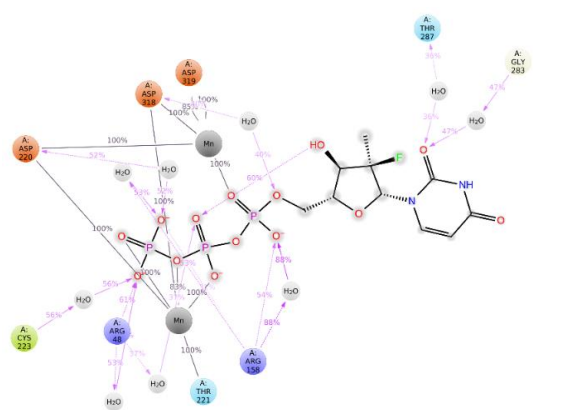

**C**

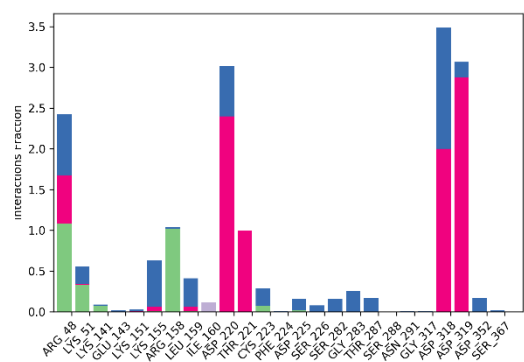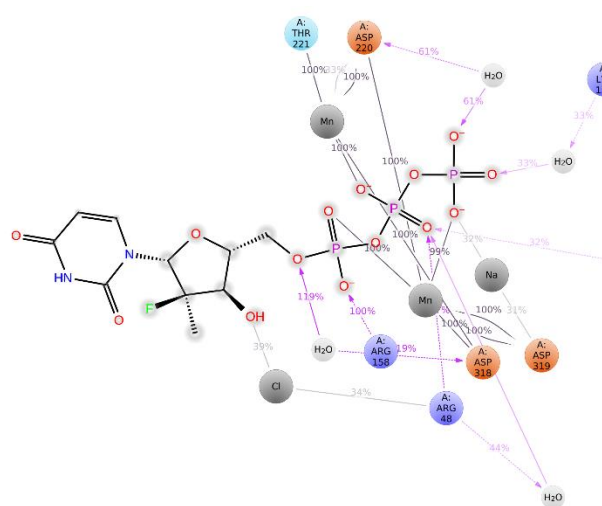

**D**

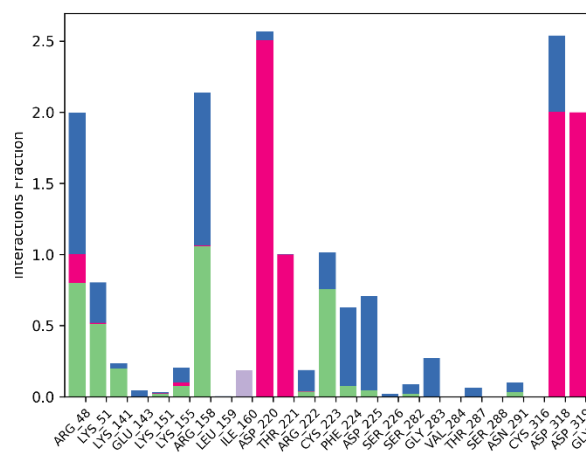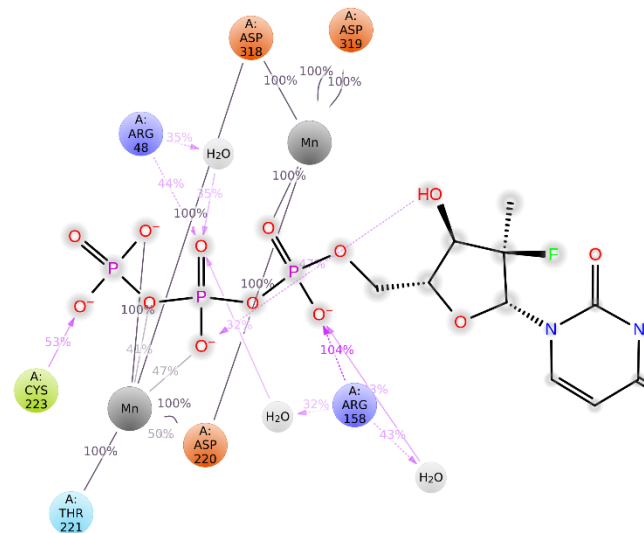

**E**

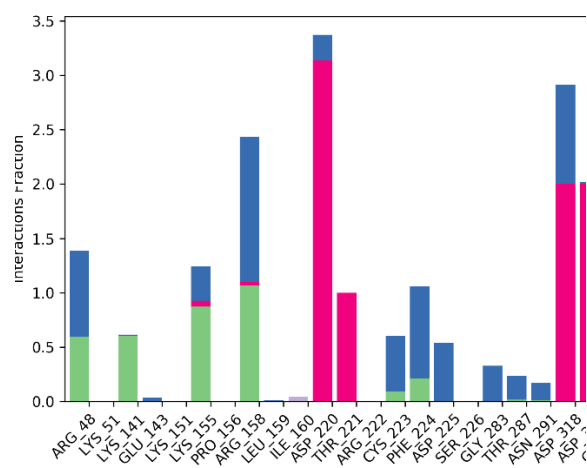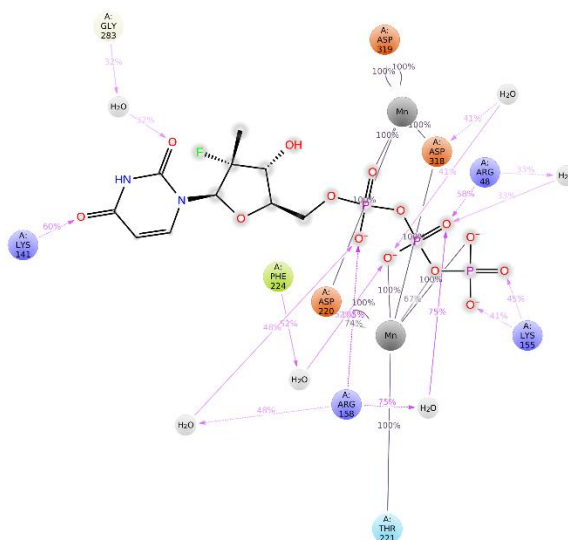

**F**

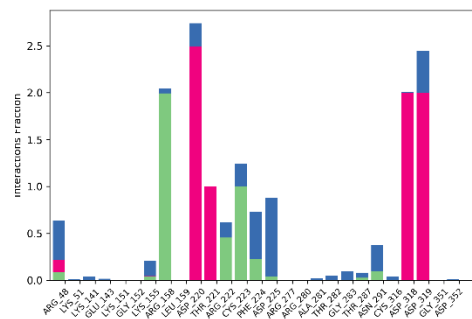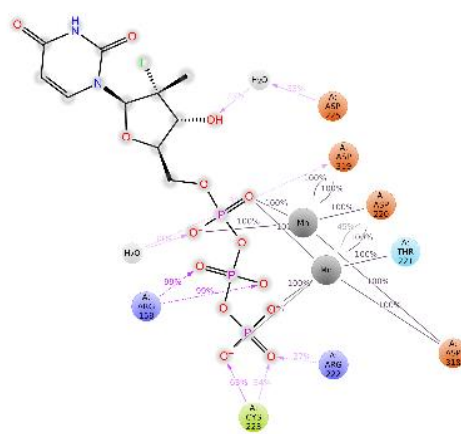

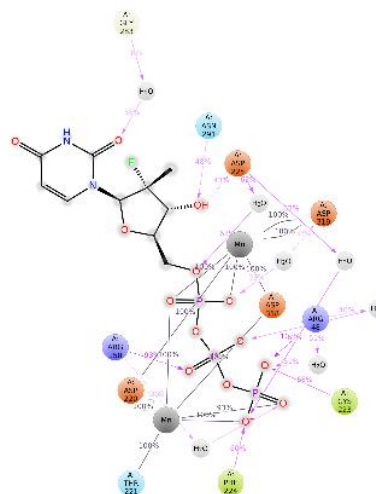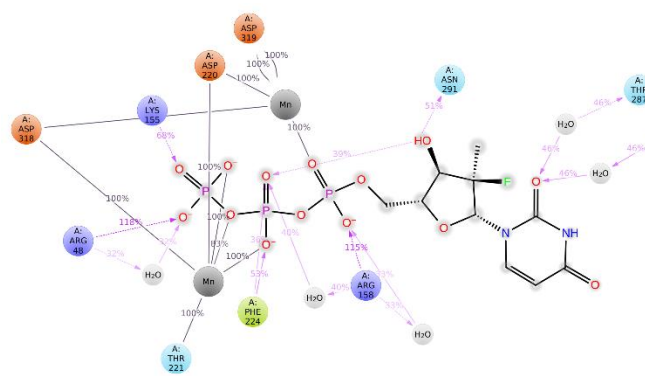

● Charged (negative)    ● Polar    — H-bond (sidechain)    ● Solvent exposure  
● Charged (positive)    ● Water    — PI-PI stacking  
● Hydrophobic    — H-bond (backbone)    — Salt bridge  
● Glycine

**Figure S4.** Protein-Ligand Interactions **A:** WT-GS-461203-run1; **B:** WT-GS-461203-run2; **C:** T179A-GS-461203-run1; **D:** T179A-GS-461203-run2; **E:** S282T-GS-461203-run1; **F:** S282T-GS-461203-run2; **G:** M289L-GS-461203-run1; **H:** M289L-GS-461203-run2, recorded during MDS. Left: the histogram diagram and the fraction of the simulation for each type of interaction showing all residues interacting with GS-461203. Right: The 2D Protein-Ligand interactions Diagrams lasting more than 20% of the MDS.

A

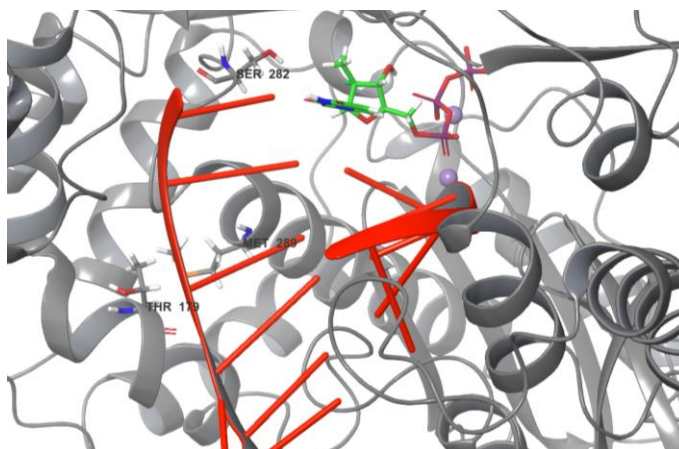

B

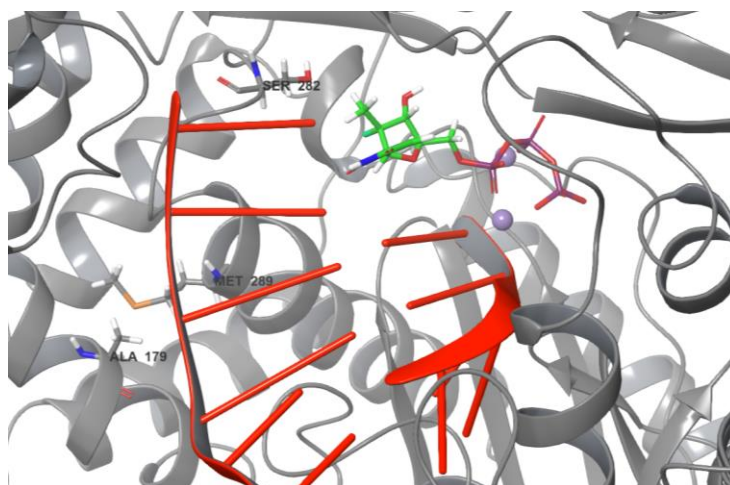

C

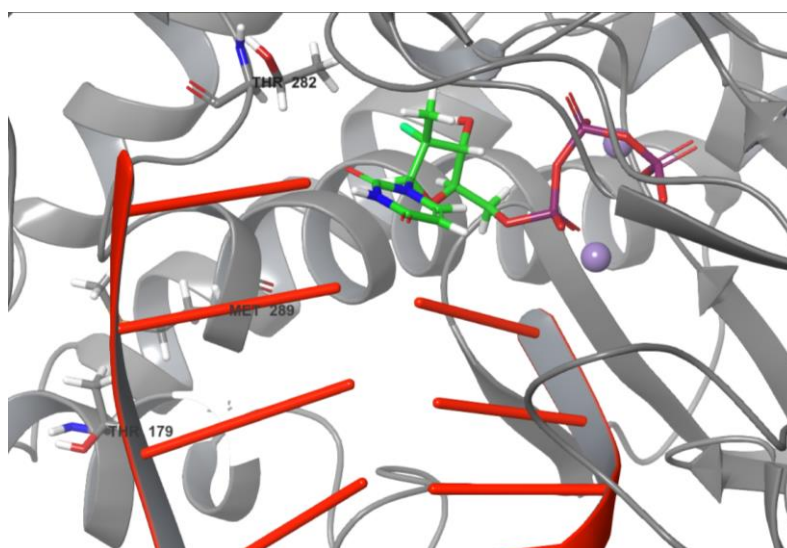

D

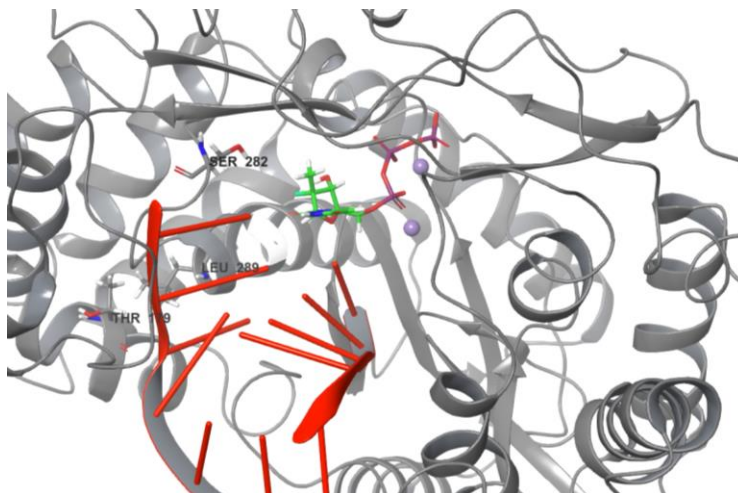

**Figure S5.** The representative structure of the most dominant structural family for **A:** WT; **B:** T179A; **C:** S282T, **D:** M289L systems.

A

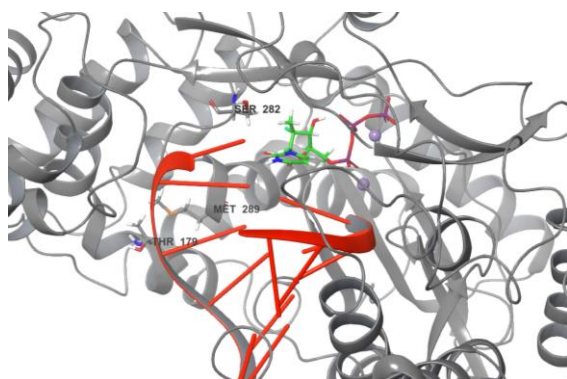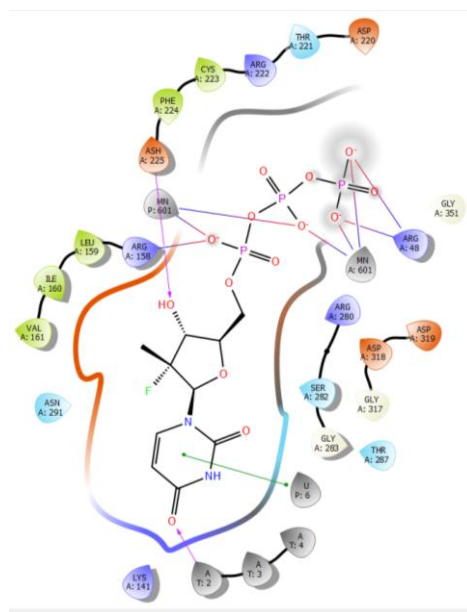

B

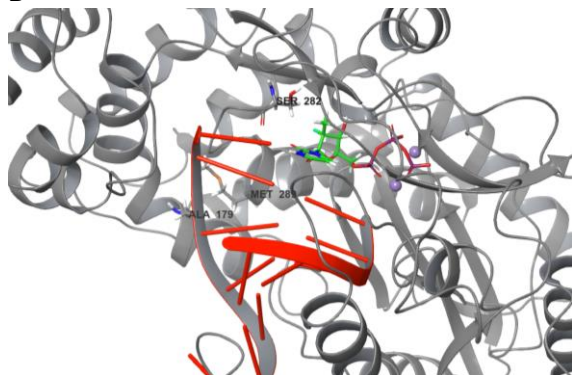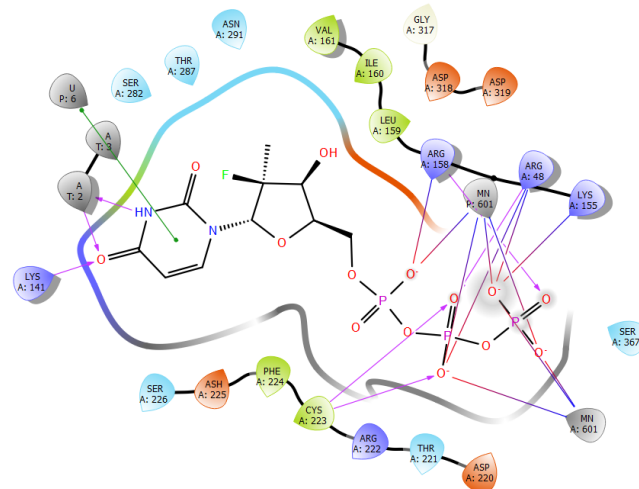

C

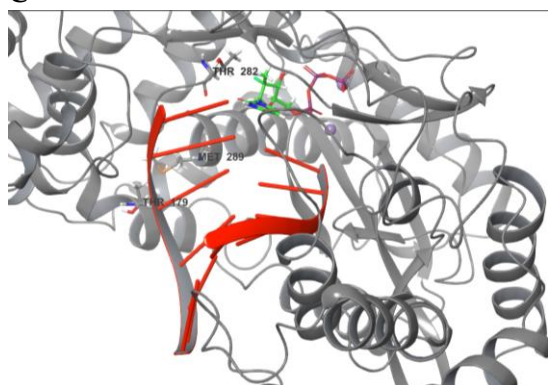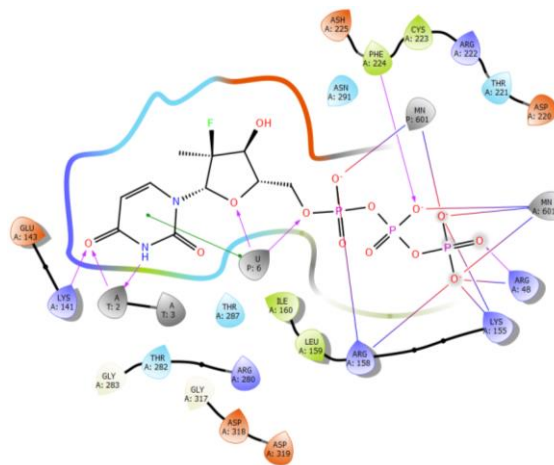

D

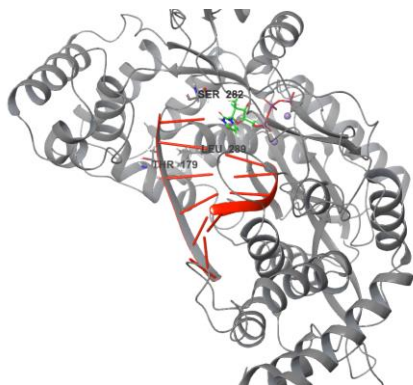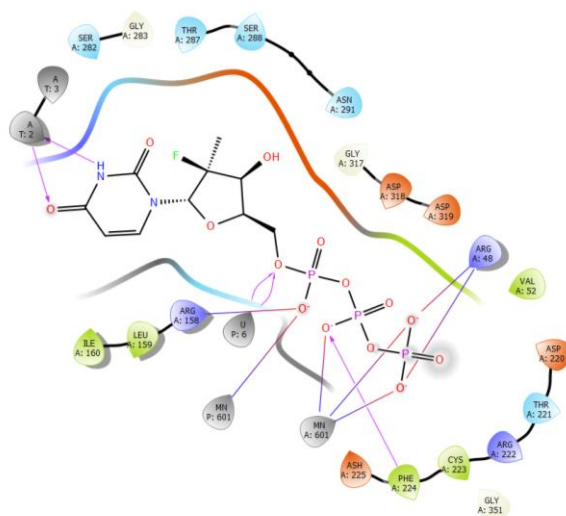

**Figure S6.** The least populated clusters for A: WT; B: T179A; C: S282T, D: M289L.

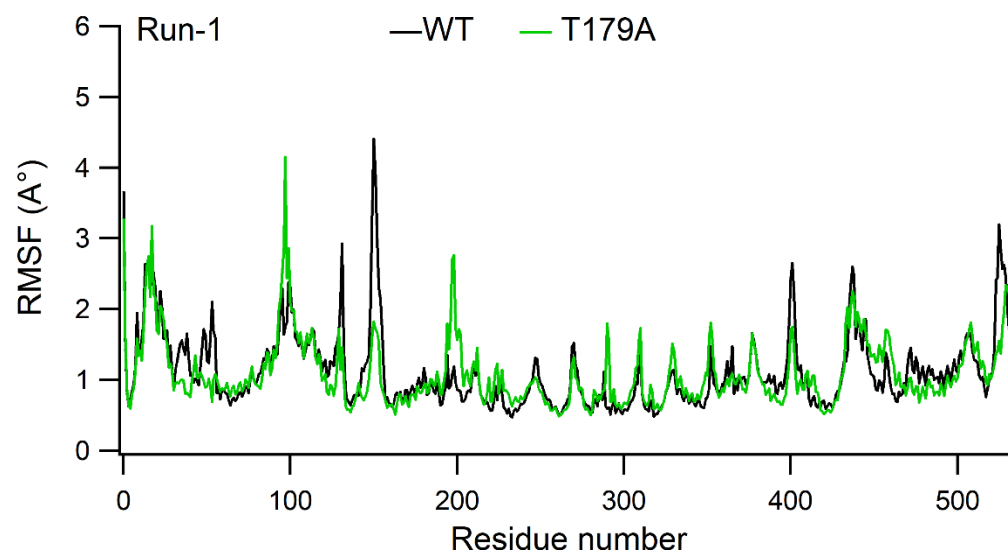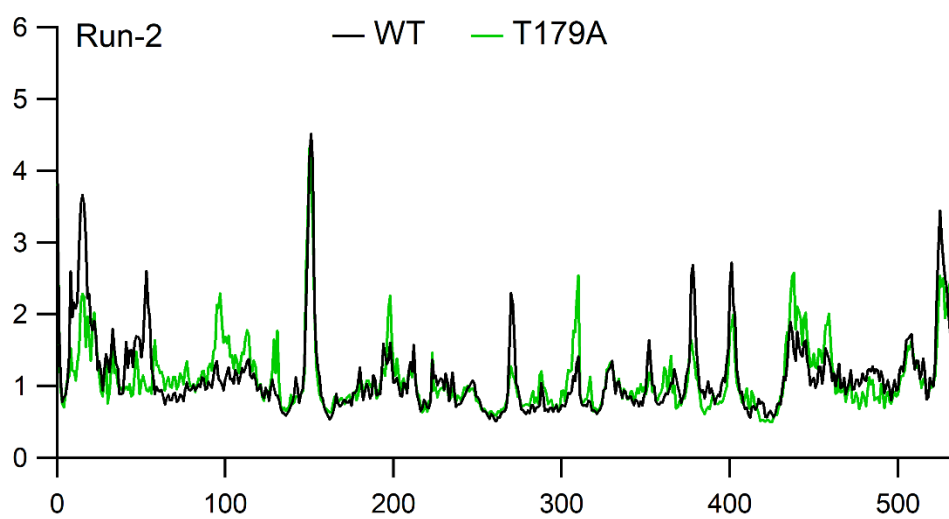

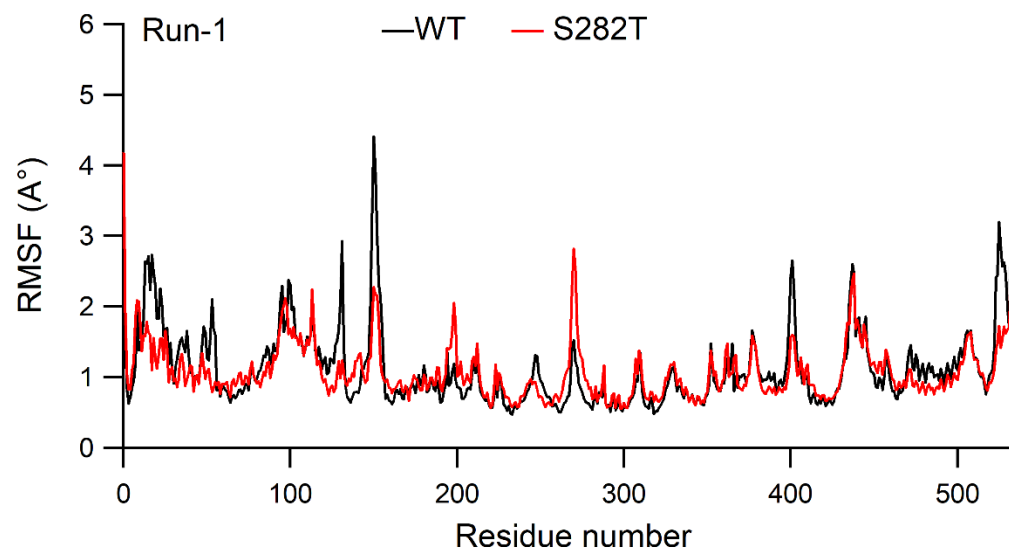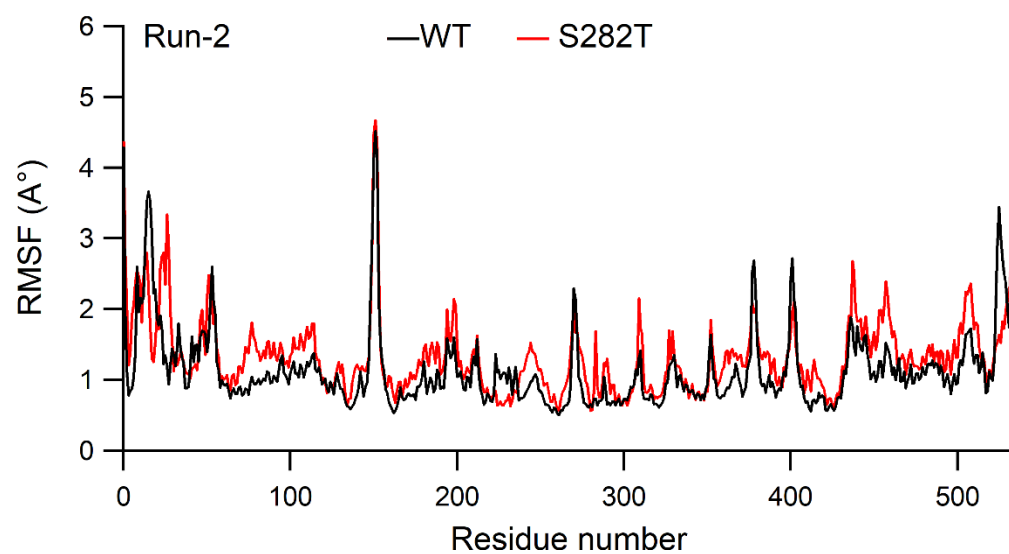

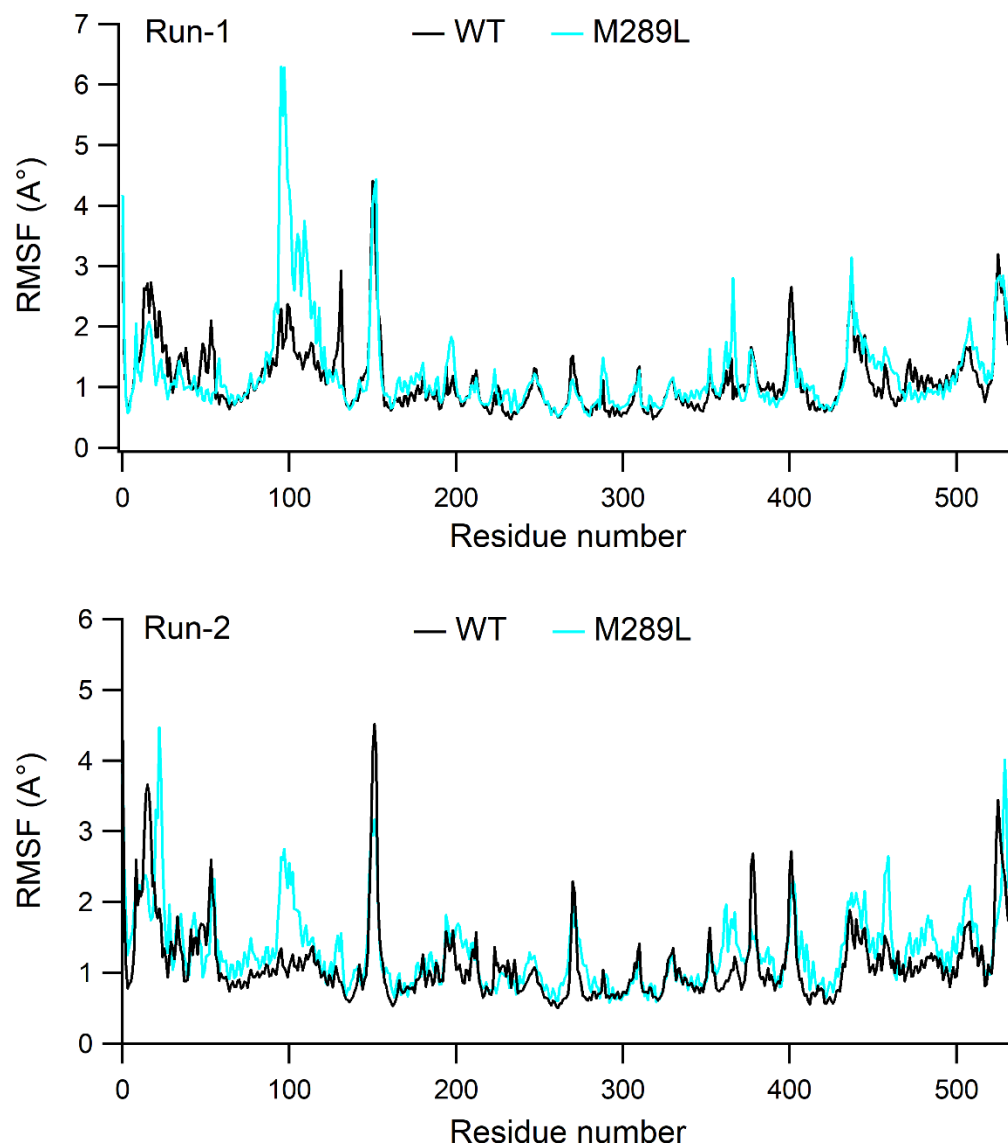

**Figure S7.** The RMSF values comparisons between WT and T179A (A), WT and S282T (B), and WT and M289L (C). The RMSF values of the C $\alpha$  atoms for residues in WT (black), T179A (green), S282T (red), and M289L (blue) are shown, and the mutant positions are noted by red asterisks.

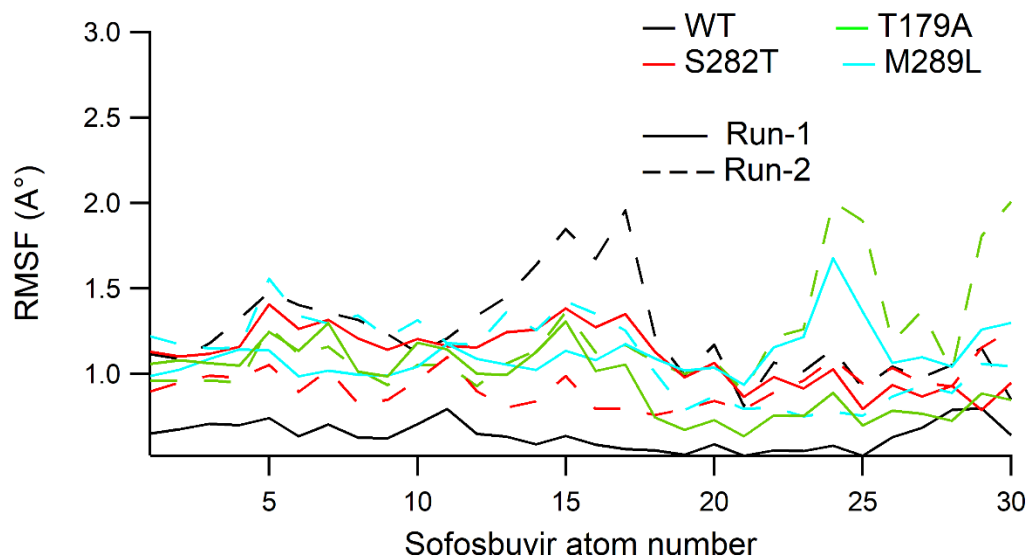

**Figure S8.** The RMSF values for atoms of GS-461203.

A

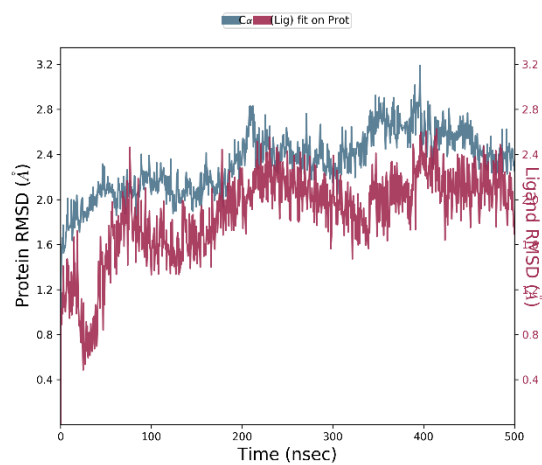

B

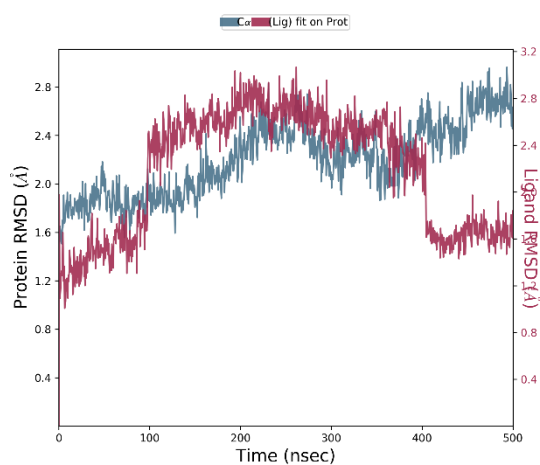

**Figure S9.** The RMSD of Protein C $\alpha$  and ligand in T179A-CompA (A) and T179A-CompB (B) systems.

| Protein Domain | Interactions Fraction (approx.) |
|----------------|---------------------------------|
| TPA_4          | 0.25                            |
| ARG_48         | 1.50                            |
| VPS_51         | 0.15                            |
| VPS_41         | 0.10                            |
| VPS_15         | 0.10                            |
| ARG_156        | 0.40                            |
| LEU_156        | 1.80                            |
| ILV_20         | 0.10                            |
| TIR_20         | 3.90                            |
| ARG_20         | 1.00                            |
| TIR_22         | 0.10                            |
| TIR_223        | 0.90                            |
| TIR_224        | 0.90                            |
| ARG_225        | 1.10                            |
| SER_260        | 0.05                            |
| SER_260        | 0.60                            |
| TIR_260        | 0.80                            |
| SER_260        | 0.80                            |
| GL_266         | 0.05                            |
| GL_266         | 0.05                            |
| TIR_266        | 0.05                            |
| ASP_261        | 0.10                            |
| ASP_318        | 2.00                            |
| ASP_318        | 2.00                            |
| ASP_351        | 0.30                            |
| ASP_351        | 0.30                            |
| SER_361        | 0.00                            |

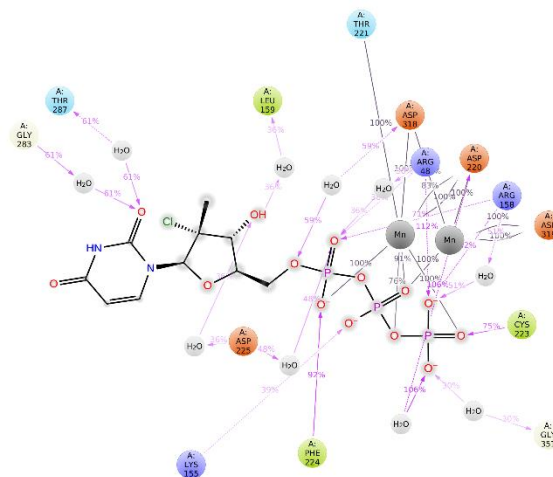[illegible]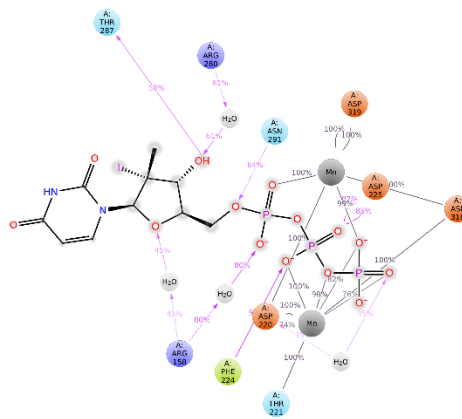

17

A

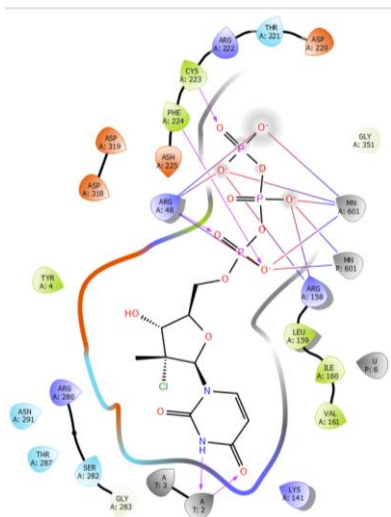

B

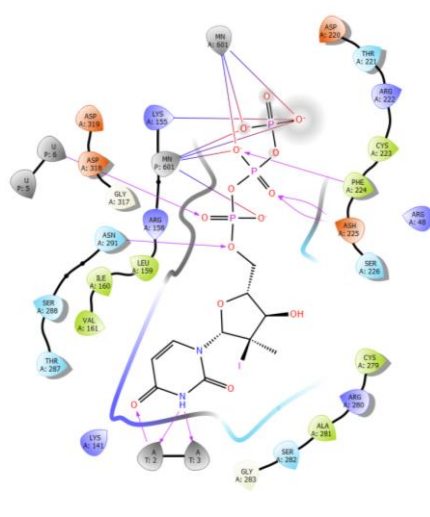

**Figure S11.** The most dominant clusters for **A:** T179A-CompA; **B:** T179A-CompB systems.

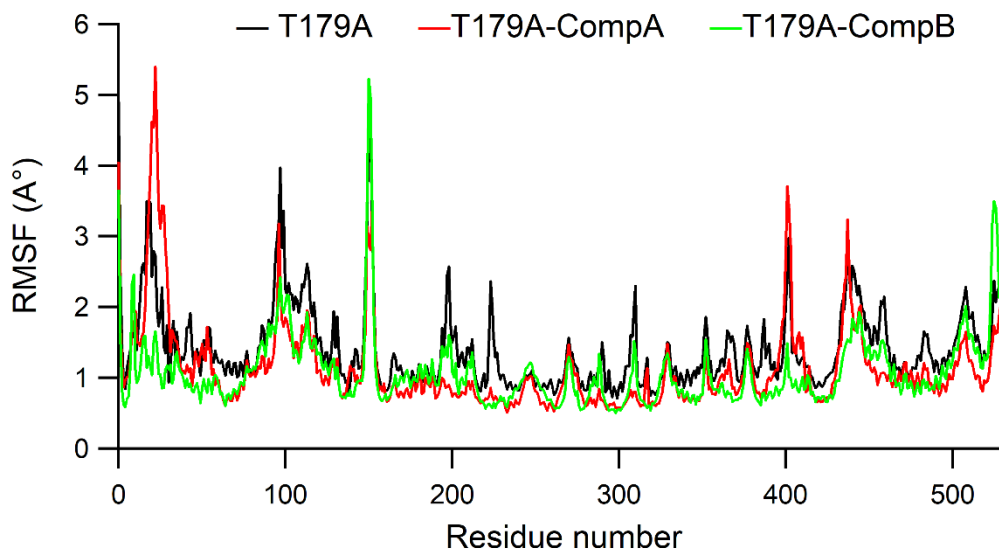

**Figure S12.** The RMSF values comparisons between T179A, T179A-CompA, and T179A-CompB systems. The RMSF values of the C $\alpha$  atoms for residues in T179A (black), T179A-CompA (green), and T179A-CompB (blue).

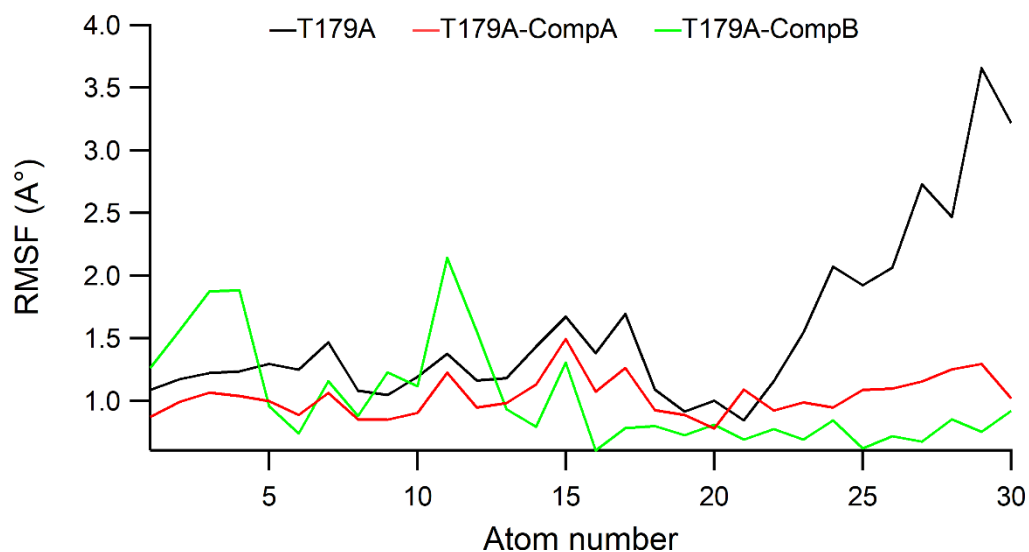

**Figure S13.** The RMSF values for atoms of GS-461203 in T179A, T179A-CompA, and T179A-CompB systems.

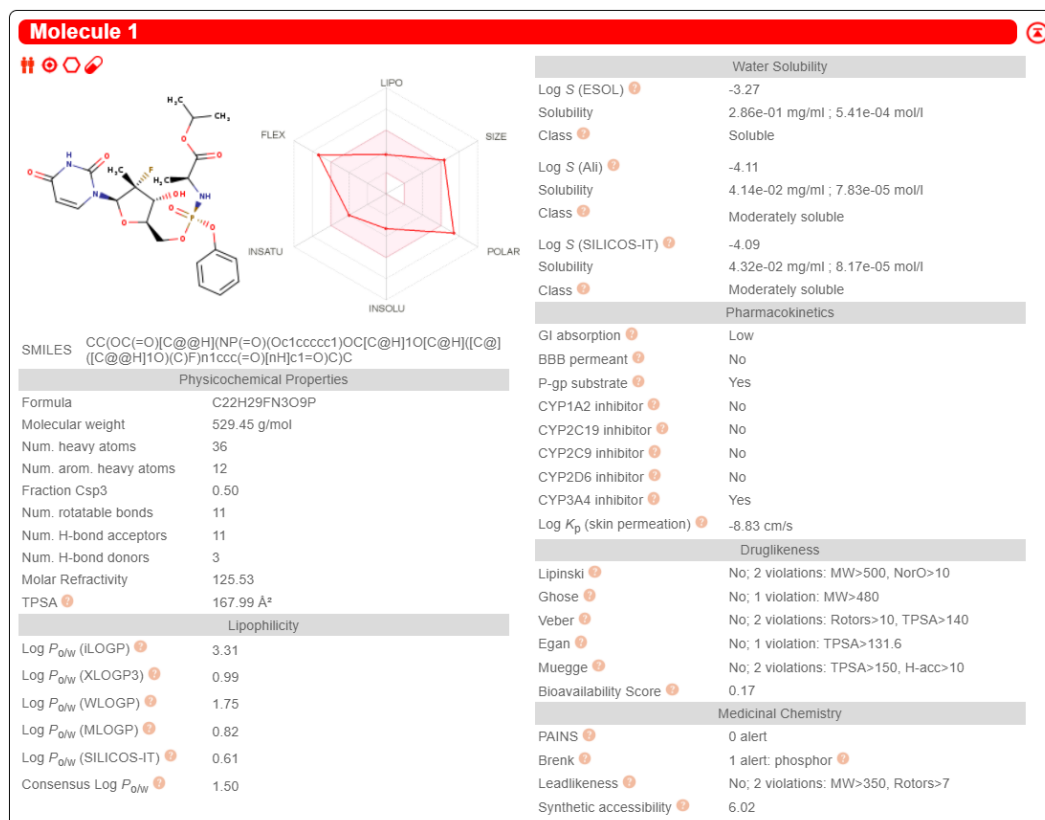

**Figure S14.** The ADME Properties of Sofosbuvir predicted by SwissAdme.

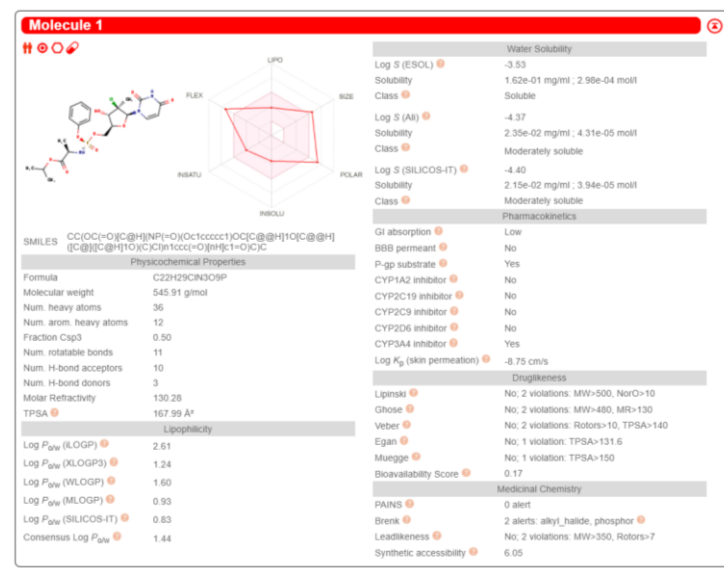

**Figure S15.** The ADME Properties of Sofosbuvir derivatives (F substituted by Cl) predicted by SwissAdme.

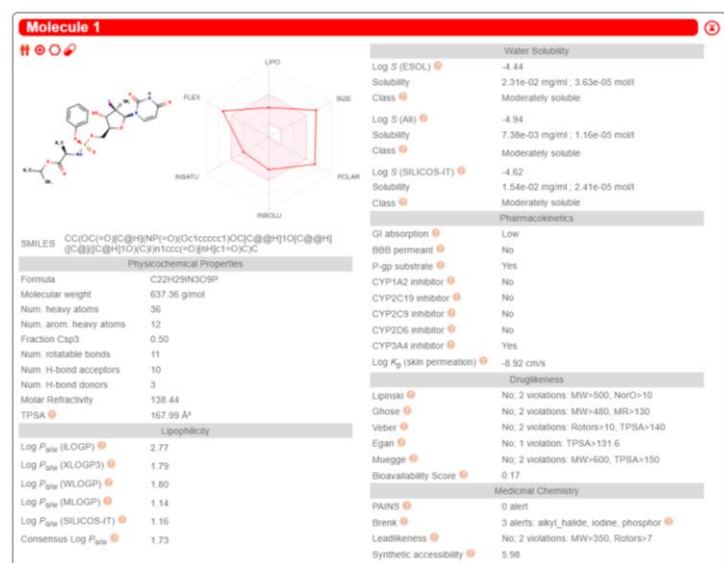

**Figure S16.** The ADME Properties of Sofosbuvir derivatives (F substituted by I) predicted by SwissAdme.

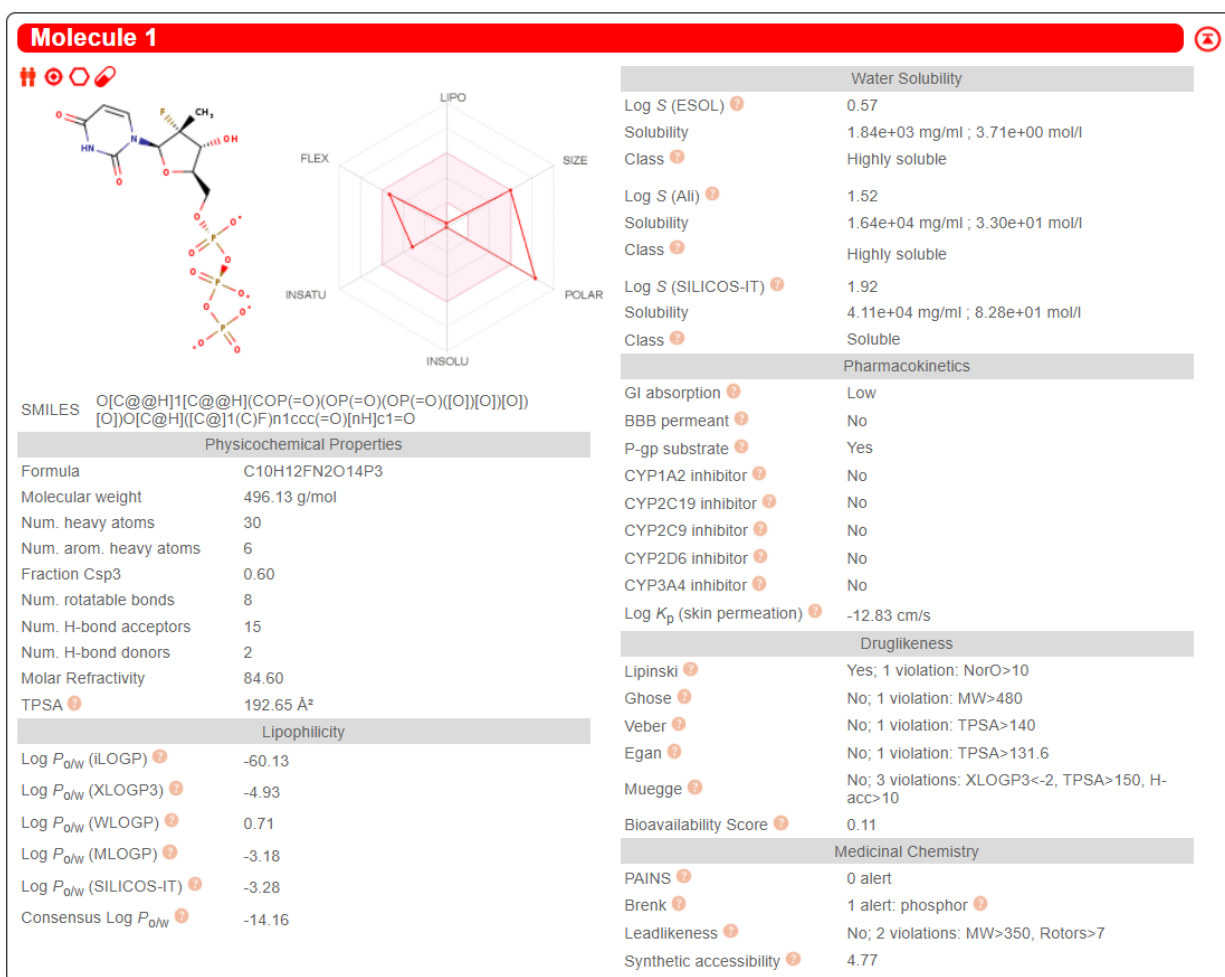

**Figure S17.** The ADME Properties of GS-461203 predicted by SwissAdme.

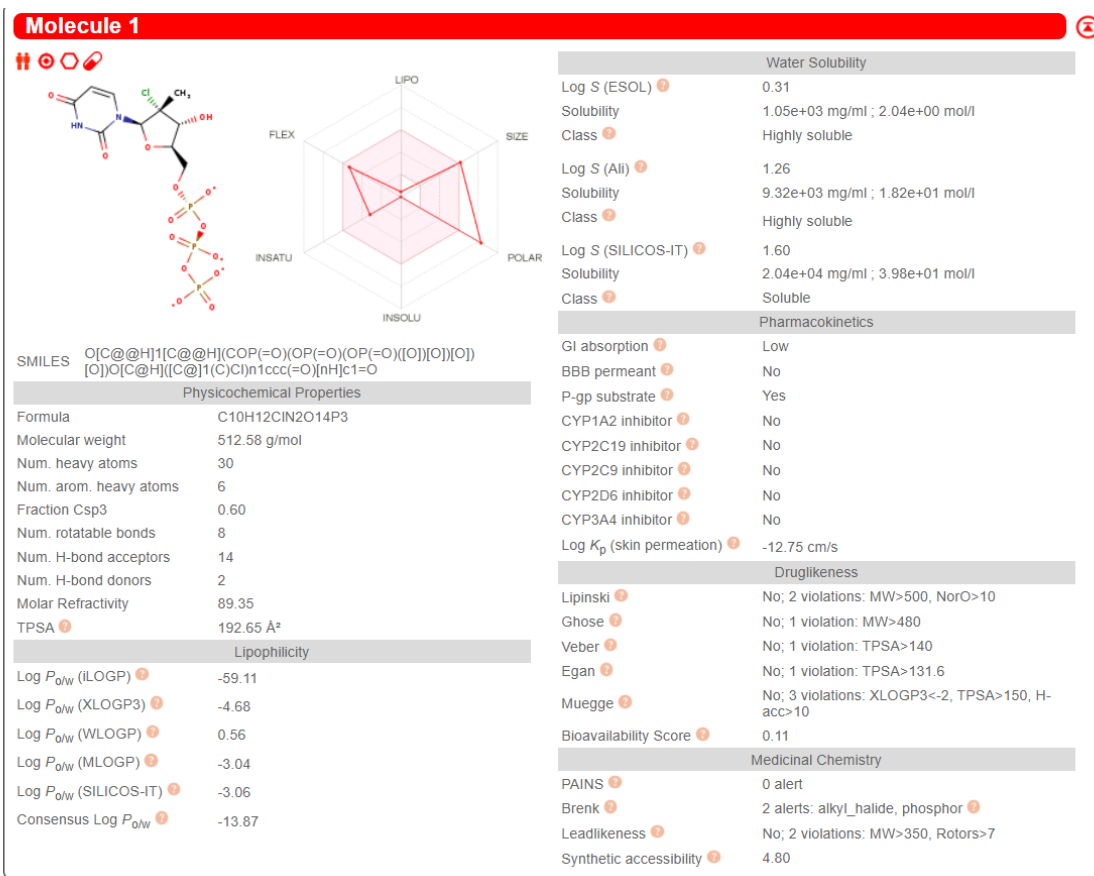

**Figure S18.** The ADME Properties of CompA predicted by SwissAdme.

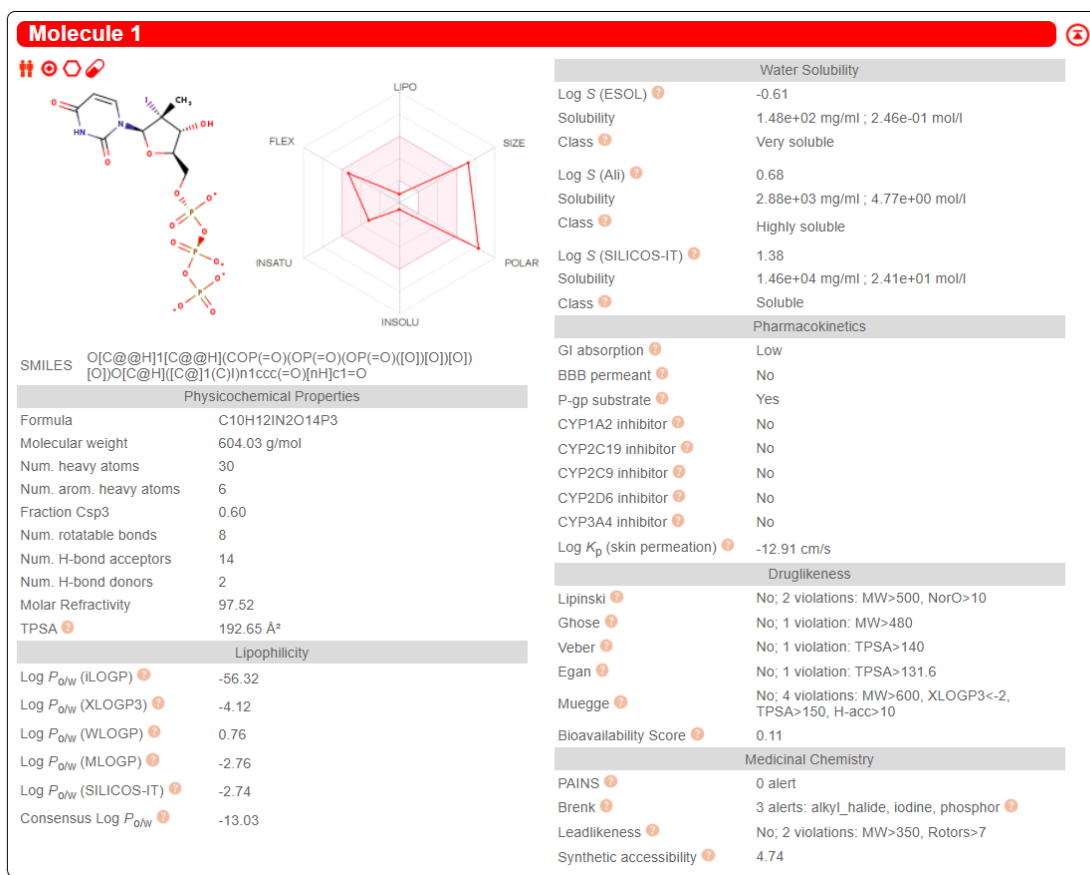

**Figure S19.** The ADME Properties of CompB predicted by SwissAdme.
